# Supplementary material
Source: HighWire-hosted journal article supplement (https://gh.bmj.com/content/3/2/e000726)

## Appendix 1: Counties included in analysis

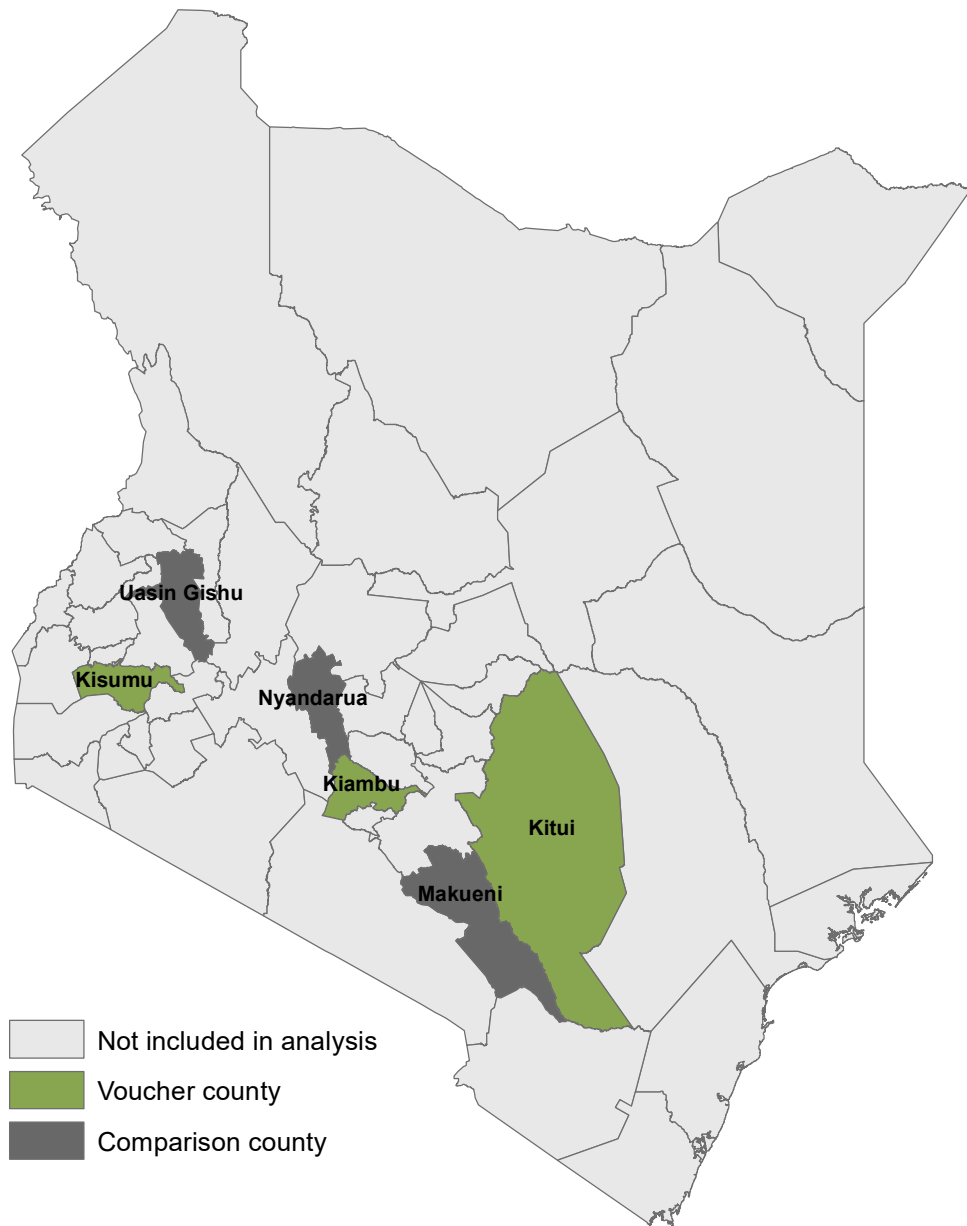

Supplement: inline-supplementary-material-1 [file inline-supplementary-material-1.pdf]
